# Supplementary material for: Performance of Cu/ZnO Nanosheets on Electrospun Al2O3 Nanofibers in CO2 Catalytic Hydrogenation to Methanol and Dimethyl Ether
Source: MDPI journal article supplement (doi:10.3390/nano13040635), 2023-02-05
Supplement: s1 [file s1]

**Table S1** Comparison of the results of the present study to those of the literature.

| Reference                           | CuO:ZnO ratio in the catalyst                            | Support type                                                    | Synthesis method                                                | BET SSA [m <sup>2</sup> /g] | GHSV or WHSV                                                                      | Tests conditions                                                                    | MeOH productivity g <sub>MeOH</sub> /kg <sub>Cu</sub> /h | DME productivity g <sub>DME</sub> /kg <sub>Cu</sub> /h | Total productivity g <sub>MeOH+DME</sub> /kg <sub>Cu</sub> /h |
|-------------------------------------|----------------------------------------------------------|-----------------------------------------------------------------|-----------------------------------------------------------------|-----------------------------|-----------------------------------------------------------------------------------|-------------------------------------------------------------------------------------|----------------------------------------------------------|--------------------------------------------------------|---------------------------------------------------------------|
| Wang <i>et al.</i> 2022 [1]         | 3 wt% of Cu/ZnO with 2.46 wt.% of Cu                     | n-Al <sub>2</sub> O <sub>3</sub> nanorods                       | incipient wetness impregnation method                           | 89.4                        | GHSV=7 800 mL/g <sub>cat</sub> /h                                                 | CO <sub>2</sub> :H <sub>2</sub> (mol.)<br>1:3<br>30 bar<br>300°C                    | 1 706                                                    | 0                                                      | 1 706                                                         |
| Navarro-Jaen <i>et al.</i> 2022 [2] | Cu/ZnO/Al <sub>2</sub> O <sub>3</sub> (wt%)= 38.6/22/6.3 | SAPO-34 (SiO <sub>2</sub> /Al <sub>2</sub> O <sub>3</sub> =0.5) | co-precipitation with following mechanical mixture with support | -                           | GHSV=3 000 mL/g <sub>cat</sub> /h                                                 | CO <sub>2</sub> :H <sub>2</sub> (mol.)<br>1:3<br>10 bar<br>220°C                    | 63                                                       | 99                                                     | 162                                                           |
| Lam <i>et al.</i> 2019 [3]          | 3.8 wt% of Cu                                            | γ-alumina                                                       | SOMC, grafting of Cu on γ-alumina                               | 141                         | GHSV=24 000 mL/g <sub>cat</sub> /h                                                | CO <sub>2</sub> :H <sub>2</sub> :N <sub>2</sub> (mol.)<br>1:3:1<br>25 bar<br>230 °C | 440                                                      | 350                                                    | 890                                                           |
| Navarro-Jaen <i>et al.</i> 2022 [4] | 7 wt% of Cu                                              | γ-alumina/ZSM-5                                                 | co-precipitation                                                | 208.6                       | GHSV=3 000 mL/g <sub>cat</sub> /h                                                 | CO <sub>2</sub> :H <sub>2</sub> :N <sub>2</sub> (mol.)<br>1:3:1<br>20 bar<br>260°C  | 76                                                       | 98                                                     | 174                                                           |
| Carvalho <i>et al.</i> 2020 [5]     | 8 wt% of Cu/ZnO (Cu/Zn=1:1) with 5.4 wt% of Cu           | γ-alumina/SiO <sub>2</sub>                                      | wet impregnation                                                | 219                         | WHSV=0.23 1/h                                                                     | CO <sub>2</sub> :H <sub>2</sub> (mol.)<br>1:3<br>50 bar<br>290°C                    | 176                                                      | 185                                                    | 362                                                           |
| Present study                       | 7 wt% Cu/Zu (Cu/Zn=1:2.3) with 2.69 wt% of Cu            | Electrospun alumina nanofibers AINFs                            | wet impregnation                                                | ~300                        | GHSV=2 626 mL/g <sub>cat</sub> /h<br>WHSV=1 g <sub>CO2</sub> /g <sub>cat</sub> /h | CO <sub>2</sub> :H <sub>2</sub> :He (mol.)<br>1:4:0.16<br>50 bar<br>300°C           | 1106                                                     | 760                                                    | 1866                                                          |

**Table S2** Cu, Zn or Cu&Zn weight loadings on Electorspun Alumina nanofibers in each catalyst and BET SSA for chosen catalystS

| Catalyst N° | Catalysts type       | Catalyst Ref.      | Metal loading of electrospun $\text{Al}_2\text{O}_3$ nanofibers [wt%] | BET SSA [m <sup>2</sup> /g] |
|-------------|----------------------|--------------------|-----------------------------------------------------------------------|-----------------------------|
| 1           | AlNFs-Zn catalysts   | AlNFs-Zn-1.5       | 1.5% Zn                                                               | 258                         |
| 2           |                      | AlNFs-Zn-3         | 3% Zn                                                                 |                             |
| 3           |                      | AlNFs-Zn-7         | 7% Zn                                                                 |                             |
| 4           |                      | AlNFs-Zn-10        | 10% Zn                                                                |                             |
| 5           | AlNFs-Cu catalysts   | AlNFs-Cu-1.5       | 1.5% Cu                                                               | 326                         |
| 6           |                      | AlNFs-Cu-3         | 3% Cu                                                                 | 278                         |
| 7           |                      | AlNFs-Cu-7         | 7% Cu                                                                 |                             |
| 8           |                      | AlNFs-Cu-10        | 10% Cu                                                                | 201                         |
| 9           | AlNFs-CuZn catalysts | AlNFs-1Cu2.3Zn-1.5 | 1.5% Cu:Zn=1:2.3                                                      | 303                         |
| 10          |                      | AlNFs-1Cu2.3Zn-3   | 3% Cu:Zn=1:2.3                                                        | 260                         |
| 11          |                      | AlNFs-1Cu2.3Zn-7   | 7% Cu:Zn=1:2.3                                                        |                             |
| 12          |                      | AlNFs-1Cu2.3Zn-10  | 10% Cu:Zn=1:2.3                                                       |                             |

### Details of conversions', selectivity's, yields' and thermodynamic calculations

CO<sub>2</sub> conversion,  $X_{CO_2}$ , was determined using the following equation:

$$X_{CO_2} = \frac{F_{CO_2inlet} - F_{CO_2outlet}}{F_{CO_2inlet}} \times 100\%$$

where  $F_{CO_2inlet}$  and  $F_{CO_2outlet}$  are the molar flowrates of CO<sub>2</sub> at the inlet and outlet of the reactor (*mol/min*), respectively.

Selectivity was calculated using the following equation:

$$S_i = \frac{F_{i\ outlet} \times N_i}{\sum_i^N F_{i\ outlet} \times N_i} \times 100\%$$

Where i is a product of reaction (namely CO, CH<sub>4</sub>, methanol or DME),  $F_{i\ outlet}$  the molar flowrate of i at the outlet of the reactor (*mol/min*) and  $N_i$  the number of carbon atoms in the product i.

Yields were calculated using the following equation:

$$Y_i = \frac{F_{i\ outlet} \times N_i}{F_{CO_2inlet} - F_{CO_2outlet}} \times 100\%$$

Methanol and DME Space Time Yield ( $P_{MeOH}$  and  $P_{DME}$ ) was calculated per mass of metal (Zn, Cu or Zn+Cu) present in the catalyst ( $g_{MeOH} \text{ kg}_{Me}^{-1}h^{-1}$ ) using the following equation:

$$P_i = \frac{F_{i\ outlet} \times M_i}{m_{Me}}$$

Where i is MeOH or DME, M is the molar mass and  $m_{Me}$  the total mass of metals in the catalyst.

Thermodynamic calculations to predict the limit of CO<sub>2</sub> conversion and products yields in a given set of operating conditions were made using the ASPEN Plus software with a Predictive Soave-Redlich-Kwong equation of state. A Gibbs reactor was used and calculations were based on the minimization of the Gibbs energy of the defined thermodynamic system containing CO<sub>2</sub>, H<sub>2</sub>, Methanol (CH<sub>3</sub>OH), Dimethyl Ether (DME) C<sub>2</sub>H<sub>6</sub>O, H<sub>2</sub>O and CO.

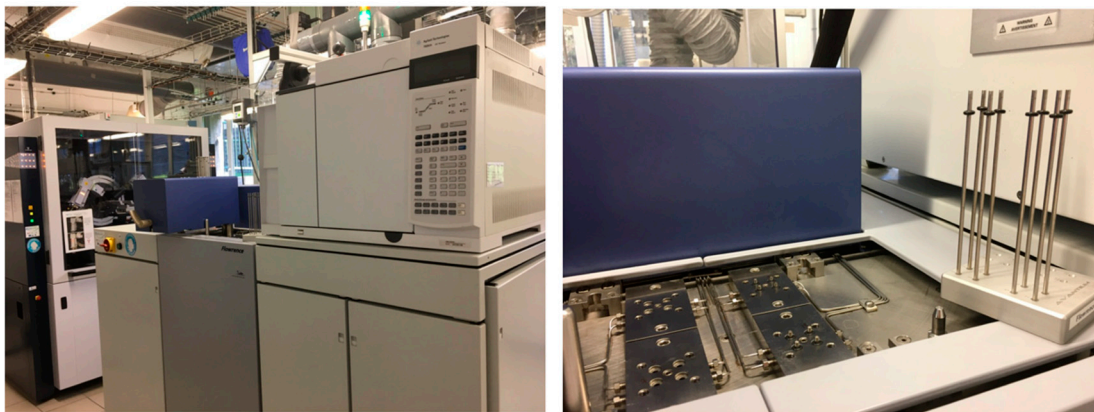

Photos of the Flowrence unit with its 4 blocks of 4 reactors

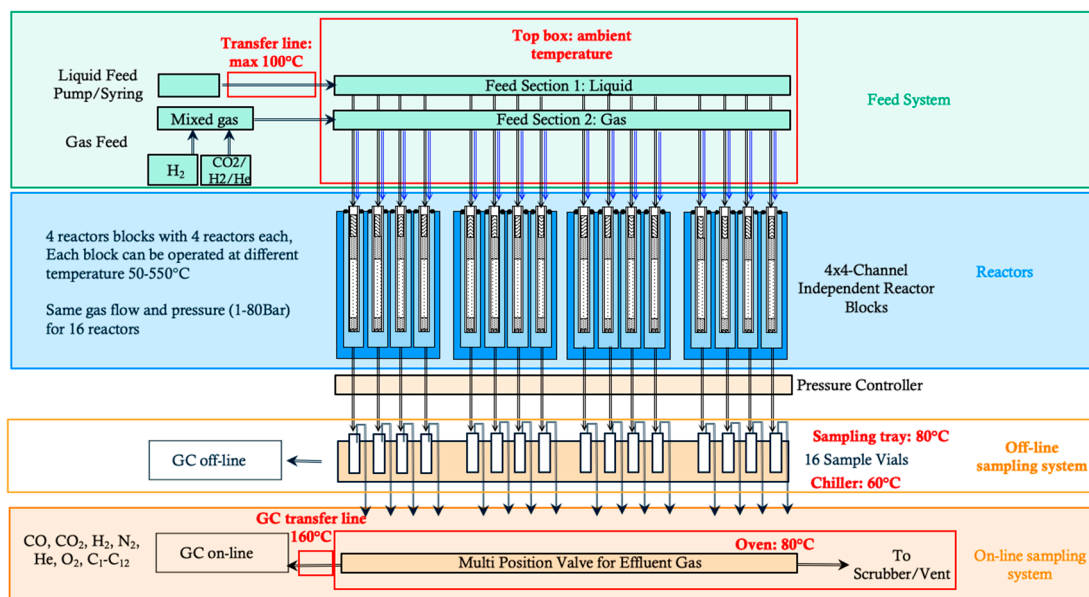

Pressure in sampling system = atm

## Scheme of the Flowrence unit

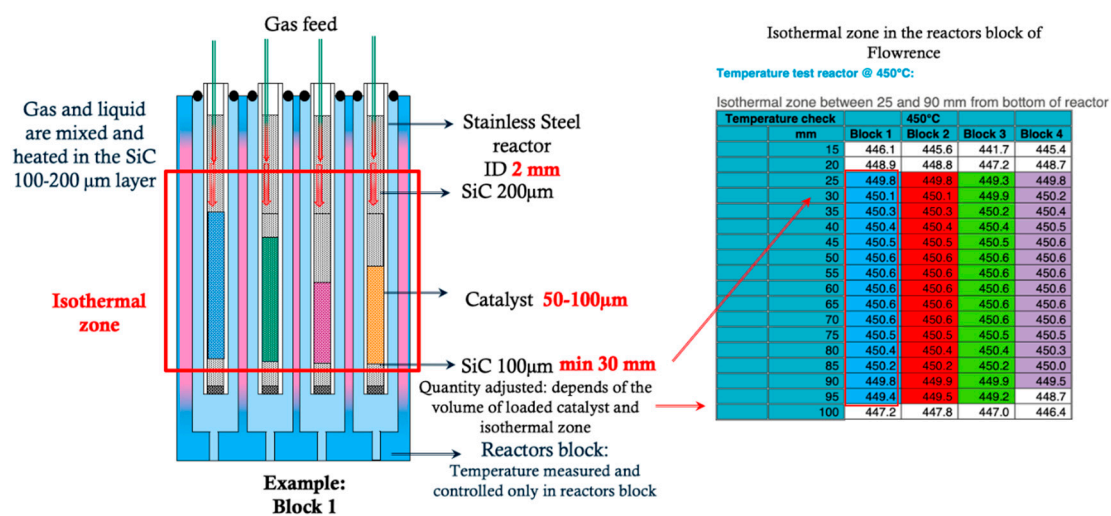

## Reactors loading

Figure S1 Photos and scheme of Flowrence and reactors loading.



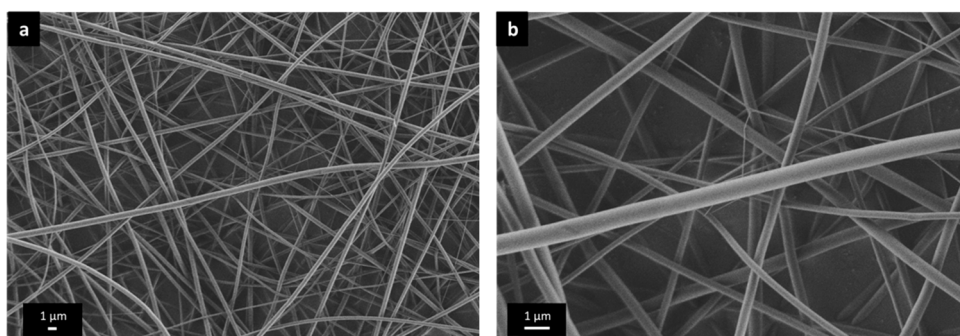

**Figure S2** SEM images of raw alumina nanofibers in different magnifications, (a) 5 k and (b) 15 k.

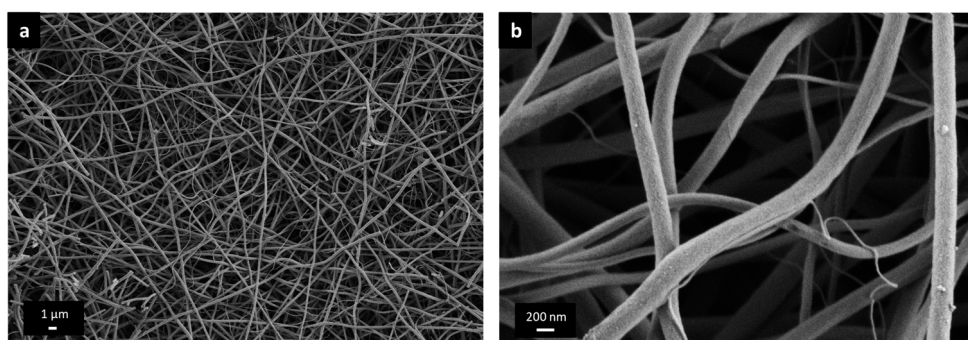

**Figure S3** SEM images of calcined (at 973 K) alumina nanofibers in different magnifications, (a) 5 k and (b) 50 k. (c) is a histogram of fibers' diameter (94 fibers).

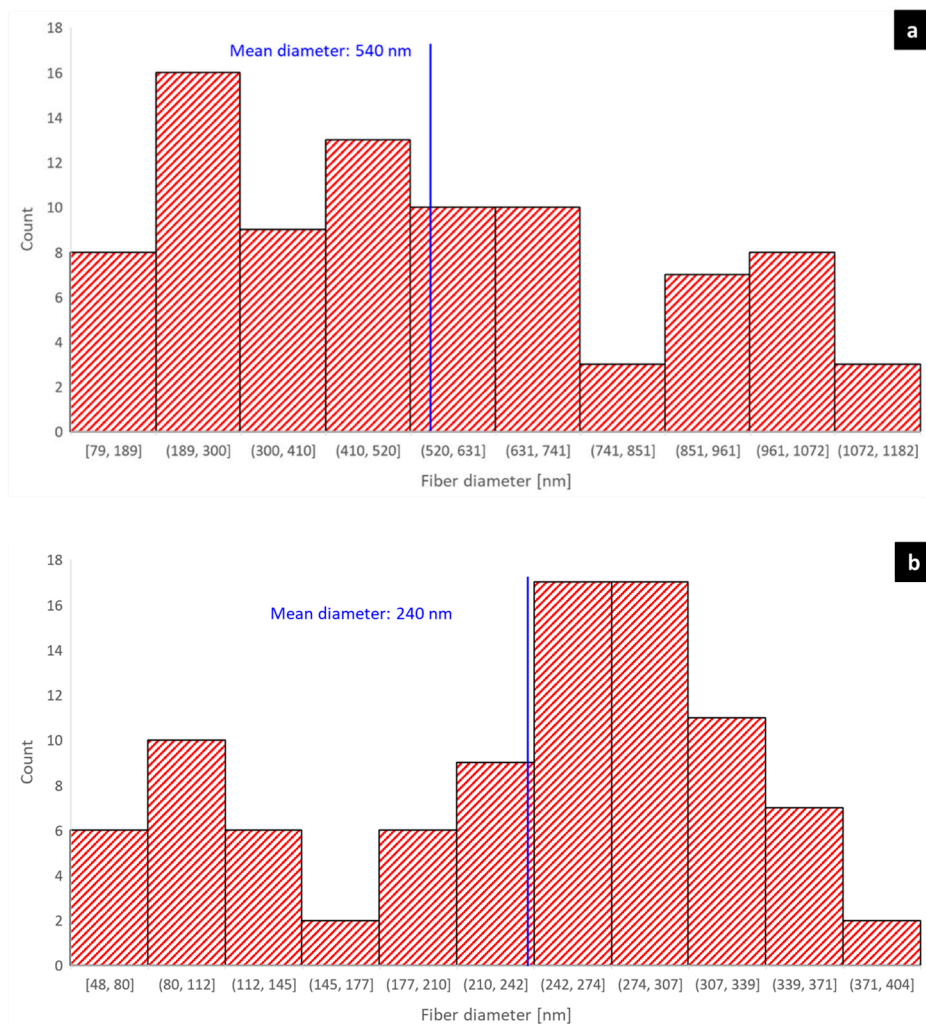

**Figure S4:** Histograms of alumina nanofibers' diameter. (a) raw nanofibers (87 fibers) (b) calcined nanofibers (94 fibers).

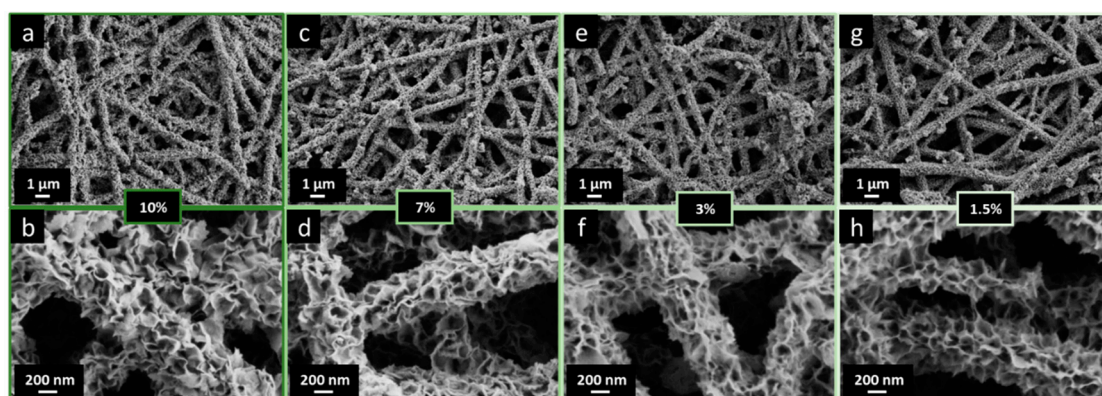

**Figure S5.** HRSEM images of AlNFs decorated by 10 (a, b), 7 (c, d) 3 (e, f) and 1.5 (g, h) wt% of Zn&Cu in the form of ZnO&CuO, in a wt. ratio of 2.3 Zn/Cu.

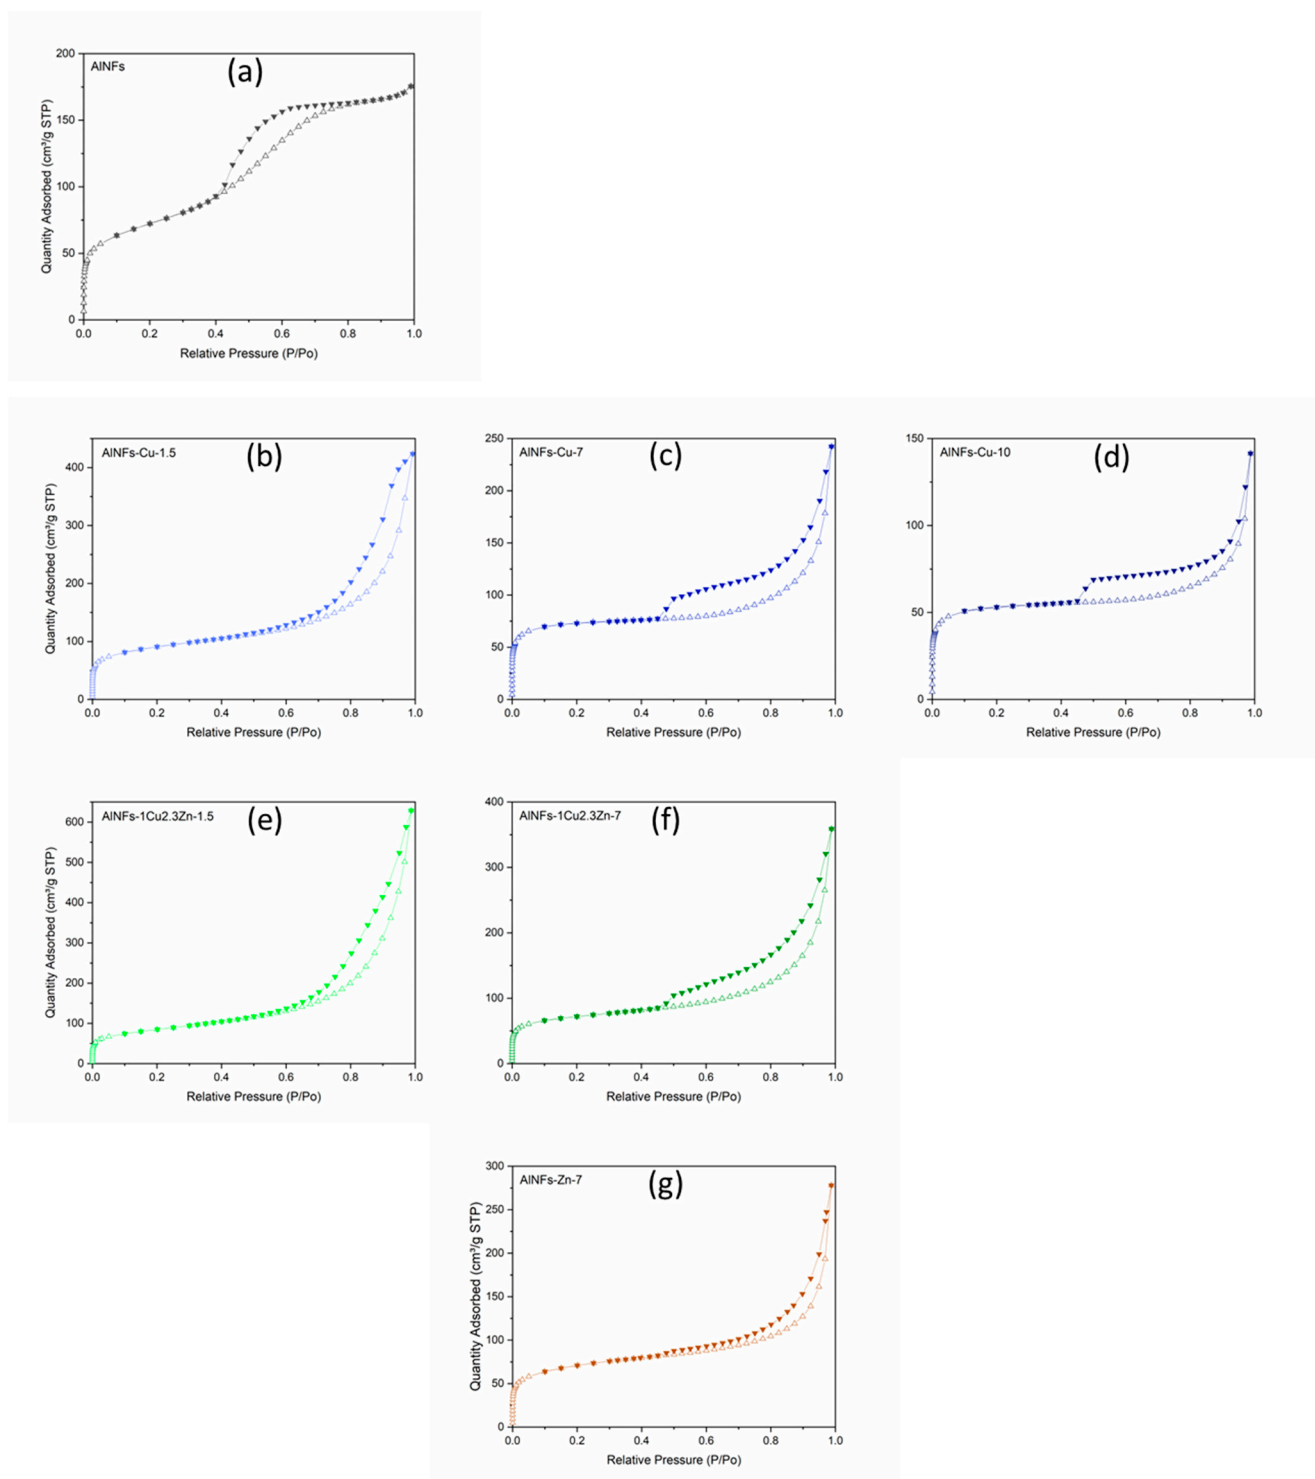

**Figure S6:** N<sub>2</sub> physisorption isotherms of calcined alumina nanofibers AINFs (a) and few calcined alumina nanofiber decorated with Cu, Zn and Cu\Zn: AINFs-Cu catalysts decorated with 1.5 wt% (b), 7 wt% (c) and 10 wt% (d) Cu, AINFs-1Cu2.3Zn catalysts decorated with 1.5 wt% (e) and 7 wt% (f) Cu and Zn (Cu/Zn=1:2.3), AINFs-Zn catalyst decorated with 7 wt% Zn (g).

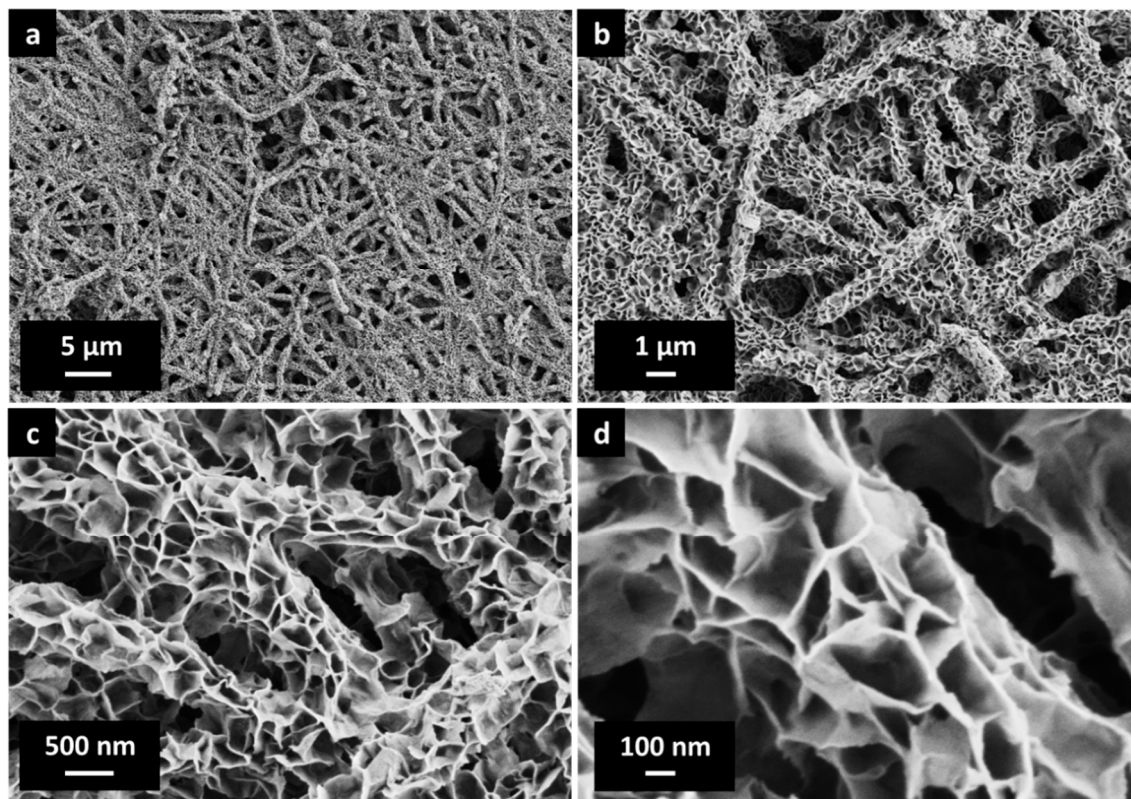

**Figure S7:** SEM images of pre-calcined AlNFs decorated by 7 wt% Zn and Cu (in a wt. ratio of 2.3 Zn/Cu) in the form of  $\text{Zn}(\text{NO}_3)_2$  and  $\text{Cu}(\text{NO}_3)_2$ . (a)-(d) are magnifications of 5 k, 15 k, 50 k and 150 k, respectively.

**Table S3** ICP and XRF results in wt%. Wt. % is defined as  $\text{Me}/(\text{Al}_2\text{O}_3 + \text{MeO})$ , when Me can be Zn, Cu or both. Deviation superior to 1% from expected values are marked in orange.

|                      |                    |                                                       | Measured and expected value [wt%] |     |          |          |     |          | Deviation from expected value [wt%] |                 |                 |                 |
|----------------------|--------------------|-------------------------------------------------------|-----------------------------------|-----|----------|----------|-----|----------|-------------------------------------|-----------------|-----------------|-----------------|
| Catalyst Ref.        |                    | Metal loading of electrospun alumina nanofibers [wt%] | Cu                                |     |          | Zn       |     |          | Cu                                  |                 | Zn              |                 |
|                      |                    |                                                       | Measured                          |     | Expected | Measured |     | Expected | XRF vs expected                     | ICP vs expected | XRF vs expected | ICP vs expected |
|                      |                    |                                                       | XRF                               | ICP |          | ICP      | XRF |          |                                     |                 |                 |                 |
| AlNFs-Zn catalysts   | AlNFs-Zn-1.5       | 1.5% Zn                                               | 0.1                               | 0.0 | 0.0      | 1.4      | 1.4 | 1.5      | 0.1                                 | 0.0             | -0.1            | -0.1            |
|                      | AlNFs-Zn-3         | 3% Zn                                                 | 0.1                               | 0.0 | 0.0      | 2.9      | 3.1 | 2.9      | 0.1                                 | 0.0             | 0.0             | 0.2             |
|                      | AlNFs-Zn-7         | 7% Zn                                                 | 0.1                               | 0.0 | 0.0      | 7.6      | 7.0 | 6.4      | 0.1                                 | 0.0             | 1.2             | 0.6             |
|                      | AlNFs-Zn-10        | 10% Zn                                                | 0.1                               | 0.0 | 0.0      | 13.4     | 9.4 | 8.9      | 0.1                                 | 0.0             | 4.5             | 0.5             |
| AlNFs-Cu catalysts   | AlNFs-Cu-1.5       | 1.5% Cu                                               | 1.8                               | 1.4 | 1.5      | 0.1      | 0.0 | 0.0      | 0.3                                 | -0.1            | 0.1             | 0.0             |
|                      | AlNFs-Cu-3         | 3% Cu                                                 | 3.4                               | 2.6 | 2.9      | 0.1      | 0.0 | 0.0      | 0.6                                 | -0.3            | 0.1             | 0.0             |
|                      | AlNFs-Cu-7         | 7% Cu                                                 | 7.7                               | 5.6 | 6.4      | 0.1      | 0.0 | 0.0      | 1.3                                 | -0.9            | 0.1             | 0.0             |
|                      | AlNFs-Cu-10        | 10% Cu                                                | 12.1                              | 9.2 | 8.9      | 0.0      | 0.0 | 0.0      | 3.2                                 | 0.3             | 0.0             | 0.0             |
| AlNFs-CuZn catalysts | AlNFs-1Cu2.3Zn-1.5 | 1.5% Cu:Zn=1:2.3                                      | 0.5                               | 0.3 | 0.4      | 1.2      | 1.0 | 1.0      | 0.0                                 | -0.2            | 0.1             | -0.1            |
|                      | AlNFs-1Cu2.3Zn-3   | 3% Cu:Zn=1:2.3                                        | 0.9                               | 0.7 | 0.9      | 1.9      | 1.8 | 2.0      | 0.0                                 | -0.2            | -0.1            | -0.2            |
|                      | AlNFs-1Cu2.3Zn-7   | 7% Cu:Zn=1:2.3                                        | 2.4                               | 1.9 | 2.0      | 4.5      | 4.0 | 4.5      | 0.5                                 | 0.0             | 0.0             | -0.5            |
|                      | AlNFs-1Cu2.3Zn-10  | 10% Cu:Zn=1:2.3                                       | 3.3                               | 2.4 | 2.7      | 6.3      | 5.1 | 6.2      | 0.6                                 | -0.3            | 0.1             | -1.1            |



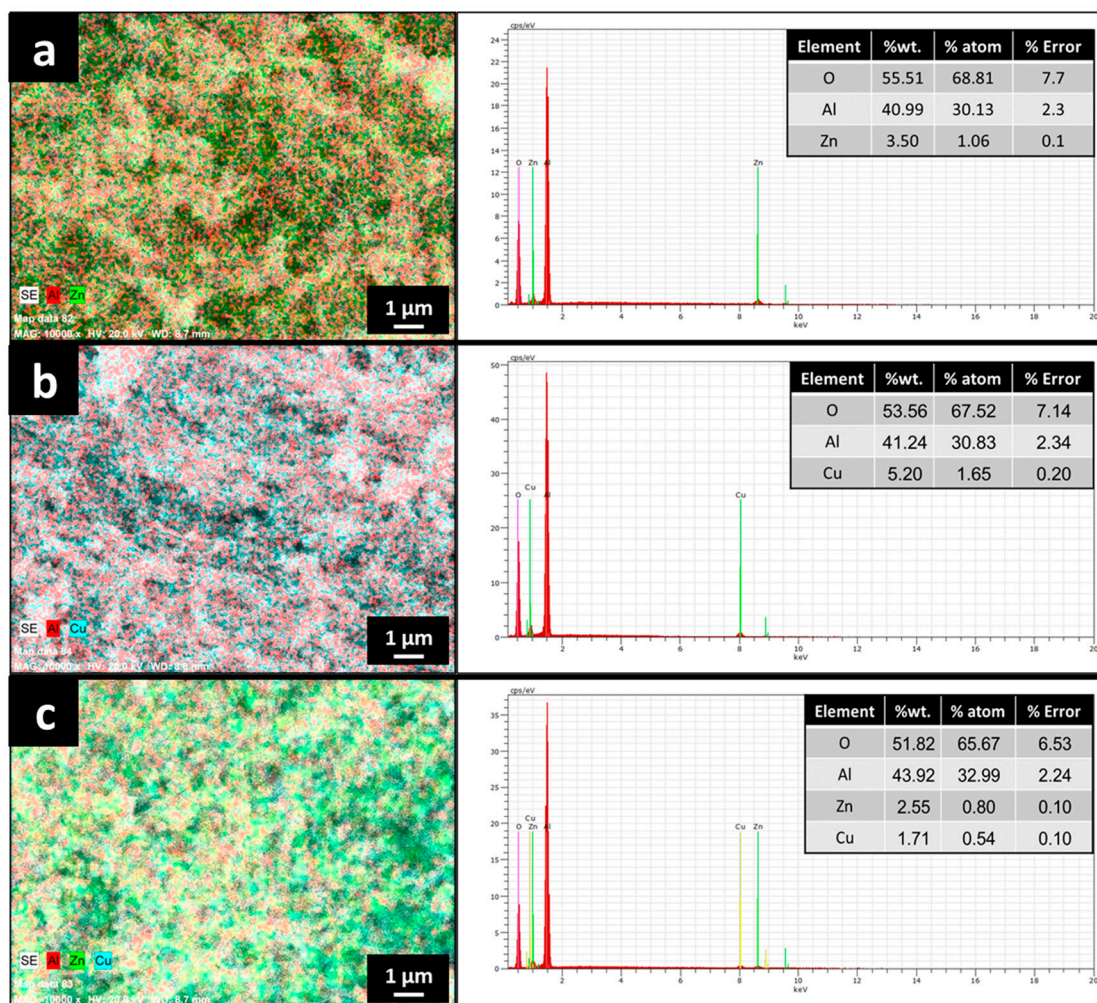

**Figure S8:** SEM-EDS results of decorated alumina nanofibers: (a) AINFs-Zn-7 – alumina nanofiber decorated with 7 wt% of Zn (in form of ZnO); (b) AINFs-Cu-7 – alumina nanofiber decorated with 7 wt% of Cu (in form of CuO); (b) AINFs-1Cu2.3Zn-7 – alumina nanofiber decorated with 7 wt% of Cu and Zn (in form of CuO and ZnO) in a wt. ratio 1:2.3

**Table S4:** particles' sizes of AlNFs-1Cu2.3Zn-10 alumina nanofibers decorated with 10 wt% of Cu and Zn in a wt. ratio 1:2.3 as calculated by Scherrer equation.

| Al-O NFs decorated by 10 wt% Zn                                          |                  | Al-O NFs decorated by 10 wt% Cu                                           |                  |
|--------------------------------------------------------------------------|------------------|---------------------------------------------------------------------------|------------------|
| 2θ (°)                                                                   | grains size (nm) | 2θ (°)                                                                    | grains size (nm) |
| Zinc aluminum oxide (Al <sub>2</sub> O <sub>4</sub> Zn)<br>gahnite phase |                  | Copper aluminum oxide (Al <sub>2</sub> CuO <sub>4</sub> )<br>spinel phase |                  |
| 19.0                                                                     | 2.1              | 18.9                                                                      | 2.5              |
| 31.6                                                                     | 2.2              | 31.9                                                                      | 1.6              |
| 37.3                                                                     | 4.1              | 37.7                                                                      | 3.2              |
| 45.6                                                                     | 2.4              | 45.5                                                                      | 1.8              |
| 60.5                                                                     | 1.8              | 60.2                                                                      | 1.6              |
| 66.6                                                                     | 4.2              | 66.8                                                                      | 3.2              |
| α-alumina (Al <sub>2</sub> O <sub>3</sub> ) phase                        |                  | α-alumina (Al <sub>2</sub> O <sub>3</sub> ) phase                         |                  |
| 25.6                                                                     | 52.3             | 25.6                                                                      | 75.7             |
| 26.3                                                                     | 24.5             | 26.2                                                                      | 9.8              |
| 35.2                                                                     | 45.0             | 35.2                                                                      | 47.1             |
| ----                                                                     | ---              | 37.8                                                                      | 62.5             |
| 43.4                                                                     | 51.7             | 43.4                                                                      | 46.8             |
| 52.6                                                                     | 54.5             | 52.6                                                                      | 45.3             |
| 57.5                                                                     | 59.3             | 57.5                                                                      | 50.5             |
| 66.5                                                                     | 22.7             | 66.5                                                                      | 31.7             |
| 68.2                                                                     | 50.7             | 68.2                                                                      | 31.2             |

| CO <sub>2</sub> conversions [%] |                    |     |      |      |      |     |      |      |      |     |      |      |      |
|---------------------------------|--------------------|-----|------|------|------|-----|------|------|------|-----|------|------|------|
| Pressure [bar]                  |                    | 10  |      |      |      | 30  |      |      |      | 50  |      |      |      |
| Temperature [°C]                |                    | 225 | 250  | 275  | 300  | 225 | 250  | 275  | 300  | 225 | 250  | 275  | 300  |
| AlHFs-Zn catalysts              | AlHFs-Zn-1.5       | 1,0 | 1,2  | 1,7  | 2,3  | 0,3 | 0,5  | 1,5  | 4,9  | 2,3 | 2,9  | 4,0  | 7,7  |
|                                 | AlHFs-Zn-3         | 0,4 | 1,2  | 2,0  | 3,5  | 0,6 | 1,0  | 2,1  | 6,3  | 2,0 | 3,4  | 5,1  | 9,8  |
|                                 | AlHFs-Zn-7         | 1,2 | 1,0  | 2,1  | 5,1  | 0,5 | 1,0  | 3,4  | 8,3  | 2,9 | 4,1  | 6,4  | 10,6 |
|                                 | AlHFs-Zn-10        | 0,4 | 0,5  | 1,7  | 3,6  | 1,1 | 0,8  | 2,4  | 6,4  | 3,1 | 3,6  | 5,1  | 6,8  |
| AlHFs-Cu catalysts              | AlHFs-Cu-1.5       | 1,8 | 3,8  | 5,7  | 8,4  | 1,2 | 2,9  | 5,4  | 9,6  | 3,0 | 4,7  | 6,6  | 5,0  |
|                                 | AlHFs-Cu-3         | 2,3 | 3,3  | 6,5  | 10,6 | 2,0 | 3,8  | 8,4  | 14,7 | 3,5 | 6,4  | 10,2 | 12,8 |
|                                 | AlHFs-Cu-7         | 4,5 | 10,5 | 18,6 | 25,3 | 4,8 | 11,1 | 21,2 | 27,7 | 6,6 | 14,4 | 23,3 | 27,5 |
|                                 | AlHFs-Cu-10        | 3,5 | 11,5 | 18,1 | 24,9 | 6,1 | 13,3 | 23,1 | 28,3 | 6,1 | 13,9 | 24,1 | 28,2 |
| AlHFs-CuZn catalysts            | AlHFs-1Cu2.3Zn-1.5 | 1,3 | 0,6  | 1,1  | 2,0  | 0,0 | 0,5  | 1,1  | 3,4  | 3,1 | 3,1  | 4,0  | 4,9  |
|                                 | AlHFs-1Cu2.3Zn-3   | 1,4 | 2,7  | 5,9  | 8,6  | 0,5 | 2,7  | 5,9  | 11,5 | 2,4 | 4,5  | 7,2  | 10,8 |
|                                 | AlHFs-1Cu2.3Zn-7   | 2,6 | 4,5  | 9,2  | 16,0 | 2,0 | 5,4  | 11,9 | 20,9 | 4,4 | 8,3  | 14,3 | 18,7 |
|                                 | AlHFs-1Cu2.3Zn-10  | 2,1 | 5,1  | 10,6 | 17,5 | 1,7 | 5,0  | 11,9 | 21,6 | 4,0 | 7,7  | 14,3 | 20,1 |

**Table S5** CO<sub>2</sub> conversions for all catalysts at pressures of 10, 30, 50 bar and temperatures of 225, 250, 275, 300 °C.

| Methanol Yield [%]   |                    |     |     |     |     |     |     |     |     |     |     |     |     |
|----------------------|--------------------|-----|-----|-----|-----|-----|-----|-----|-----|-----|-----|-----|-----|
| Pressure [bar] =>    |                    | 10  |     |     |     | 30  |     |     |     | 50  |     |     |     |
| Temperature [°C] =>  |                    | 225 | 250 | 275 | 300 | 225 | 250 | 275 | 300 | 225 | 250 | 275 | 300 |
| AlHFs-Zn catalysts   | AlHFs-Zn-1.5       | 0,0 | 0,0 | 0,0 | 0,0 | 0,0 | 0,1 | 0,0 | 0,0 | 0,1 | 0,0 | 0,0 | 0,1 |
|                      | AlHFs-Zn-3         | 0,0 | 0,0 | 0,0 | 0,0 | 0,1 | 0,0 | 0,0 | 0,0 | 0,0 | 0,0 | 0,0 | 0,4 |
|                      | AlHFs-Zn-7         | 0,0 | 0,0 | 0,0 | 0,1 | 0,0 | 0,0 | 0,3 | 0,5 | 0,0 | 0,0 | 0,2 | 0,6 |
|                      | AlHFs-Zn-10        | 0,0 | 0,0 | 0,0 | 0,0 | 0,1 | 0,0 | 0,4 | 0,5 | 0,1 | 0,0 | 0,2 | 0,9 |
| AlHFs-Cu catalysts   | AlHFs-Cu-1.5       | 0,0 | 0,0 | 0,3 | 0,2 | 0,1 | 0,2 | 0,7 | 0,6 | 0,2 | 0,2 | 0,4 | 0,0 |
|                      | AlHFs-Cu-3         | 0,0 | 0,1 | 0,4 | 0,4 | 0,3 | 0,5 | 1,1 | 1,2 | 0,3 | 0,8 | 1,1 | 1,9 |
|                      | AlHFs-Cu-7         | 0,0 | 0,6 | 1,1 | 0,8 | 1,3 | 2,3 | 3,8 | 3,5 | 2,2 | 3,3 | 5,0 | 6,3 |
|                      | AlHFs-Cu-10        | 0,7 | 1,1 | 1,4 | 0,6 | 1,8 | 2,9 | 3,9 | 3,8 | 3,0 | 4,5 | 6,1 | 7,0 |
| AlHFs-CuZn catalysts | AlHFs-1Cu2.3Zn-1.5 | 0,0 | 0,0 | 0,0 | 0,0 | 0,1 | 0,0 | 0,0 | 0,0 | 0,0 | 0,0 | 0,0 | 0,1 |
|                      | AlHFs-1Cu2.3Zn-3   | 0,0 | 0,0 | 0,3 | 0,3 | 0,1 | 0,3 | 0,8 | 0,8 | 0,2 | 0,3 | 0,5 | 0,4 |
|                      | AlHFs-1Cu2.3Zn-7   | 0,1 | 0,3 | 0,7 | 0,8 | 0,6 | 1,1 | 2,1 | 2,3 | 0,9 | 1,4 | 2,4 | 3,1 |
|                      | AlHFs-1Cu2.3Zn-10  | 0,0 | 0,1 | 0,7 | 0,8 | 0,7 | 1,1 | 2,1 | 2,5 | 1,0 | 1,6 | 2,7 | 3,4 |

**Table S6** Methanol yield for all catalysts at pressures of 10, 30, 50 bar and temperatures of 225, 250, 275, 300 °C.

|                      |                    | DME Yield [%]       |     |     |     |     |     |     |     |     |     |     |     |     |     |
|----------------------|--------------------|---------------------|-----|-----|-----|-----|-----|-----|-----|-----|-----|-----|-----|-----|-----|
|                      |                    | Pressure [bar] =>   |     | 10  |     |     |     | 30  |     |     |     | 50  |     |     |     |
|                      |                    | Temperature [°C] => |     | 225 | 250 | 275 | 300 | 225 | 250 | 275 | 300 | 225 | 250 | 275 | 300 |
| AlHFs-Zn catalysts   | AlHFs-Zn-1.5       | 0,0                 | 0,0 | 0,0 | 0,1 | 0,0 | 0,0 | 0,1 | 0,1 | 0,0 | 0,1 | 0,1 | 0,1 | 0,1 | 0,0 |
|                      | AlHFs-Zn-3         | 0,0                 | 0,1 | 0,1 | 0,1 | 0,0 | 0,0 | 0,1 | 0,2 | 0,0 | 0,1 | 0,2 | 0,2 | 0,2 | 0,2 |
|                      | AlHFs-Zn-7         | 0,0                 | 0,1 | 0,1 | 0,2 | 0,0 | 0,1 | 0,3 | 0,4 | 0,1 | 0,1 | 0,2 | 0,5 | 0,5 | 0,5 |
|                      | AlHFs-Zn-10        | 0,0                 | 0,0 | 0,1 | 0,1 | 0,0 | 0,0 | 0,2 | 0,4 | 0,0 | 0,1 | 0,2 | 0,6 | 0,6 | 0,6 |
| AlHFs-Cu catalysts   | AlHFs-Cu-1.5       | 0,2                 | 0,3 | 0,2 | 0,1 | 0,6 | 0,5 | 0,7 | 0,4 | 0,3 | 0,6 | 0,3 | 0,1 | 0,1 | 0,1 |
|                      | AlHFs-Cu-3         | 0,3                 | 0,6 | 0,6 | 0,3 | 0,9 | 1,3 | 1,3 | 0,8 | 0,7 | 1,5 | 1,8 | 1,2 | 1,2 | 1,2 |
|                      | AlHFs-Cu-7         | 1,0                 | 1,2 | 1,1 | 0,3 | 2,1 | 3,0 | 3,4 | 3,0 | 2,0 | 3,2 | 4,4 | 6,0 | 6,0 | 6,0 |
|                      | AlHFs-Cu-10        | 1,2                 | 1,4 | 1,0 | 0,2 | 2,2 | 2,9 | 3,6 | 3,3 | 2,2 | 3,2 | 4,9 | 7,0 | 7,0 | 7,0 |
| AlHFs-CuZn catalysts | AlHFs-1Cu2.3Zn-1.5 | 0,0                 | 0,0 | 0,0 | 0,0 | 0,0 | 0,0 | 0,0 | 0,1 | 0,0 | 0,0 | 0,0 | 0,0 | 0,0 | 0,0 |
|                      | AlHFs-1Cu2.3Zn-3   | 0,2                 | 0,3 | 0,3 | 0,2 | 0,5 | 0,7 | 0,8 | 0,5 | 0,4 | 0,6 | 0,7 | 0,1 | 0,1 | 0,1 |
|                      | AlHFs-1Cu2.3Zn-7   | 0,2                 | 0,8 | 0,9 | 0,6 | 1,1 | 1,9 | 2,3 | 2,2 | 0,9 | 2,2 | 3,1 | 2,9 | 2,9 | 2,9 |
|                      | AlHFs-1Cu2.3Zn-10  | 0,2                 | 0,3 | 0,8 | 0,5 | 0,7 | 1,4 | 2,2 | 2,2 | 0,7 | 2,2 | 3,1 | 3,2 | 3,2 | 3,2 |

**Table S7** DME yield for all catalysts at pressures of 10, 30, 50 bar and temperatures of 225, 250, 275, 300 °C.

|                      |                    | CO Yield [%]        |     |      |      |     |     |      |      |     |     |      |      |     |     |
|----------------------|--------------------|---------------------|-----|------|------|-----|-----|------|------|-----|-----|------|------|-----|-----|
|                      |                    | Pressure [bar] =>   |     | 10   |      |     |     | 30   |      |     |     | 50   |      |     |     |
|                      |                    | Temperature [°C] => |     | 225  | 250  | 275 | 300 | 225  | 250  | 275 | 300 | 225  | 250  | 275 | 300 |
| AlHFs-Zn catalysts   | AlHFs-Zn-1.5       | 0,0                 | 0,0 | 1,3  | 2,6  | 0,0 | 0,4 | 2,0  | 4,2  | 0,0 | 1,0 | 2,4  | 6,3  |     |     |
|                      | AlHFs-Zn-3         | 0,0                 | 0,2 | 1,8  | 3,3  | 0,0 | 1,0 | 2,4  | 5,1  | 0,0 | 1,3 | 3,0  | 6,6  |     |     |
|                      | AlHFs-Zn-7         | 0,0                 | 0,2 | 2,6  | 4,5  | 0,0 | 1,3 | 3,2  | 6,2  | 0,0 | 1,3 | 3,5  | 8,2  |     |     |
|                      | AlHFs-Zn-10        | 0,0                 | 0,0 | 1,6  | 3,2  | 0,0 | 1,1 | 2,5  | 5,0  | 0,0 | 1,2 | 2,8  | 5,2  |     |     |
|                      | AlHFs-Cu-1.5       | 0,4                 | 2,1 | 4,2  | 7,1  | 1,1 | 2,5 | 4,8  | 7,3  | 0,2 | 2,1 | 3,6  | 4,4  |     |     |
| AlHFs-Cu catalysts   | AlHFs-Cu-3         | 1,2                 | 2,7 | 5,1  | 8,5  | 1,3 | 2,9 | 6,0  | 10,2 | 1,2 | 3,5 | 6,1  | 8,0  |     |     |
|                      | AlHFs-Cu-7         | 2,6                 | 7,6 | 14,1 | 20,3 | 2,4 | 7,3 | 14,2 | 19,3 | 2,4 | 6,9 | 13,6 | 17,1 |     |     |
|                      | AlHFs-Cu-10        | 2,8                 | 7,1 | 14,1 | 20,4 | 3,1 | 8,3 | 15,4 | 19,2 | 3,1 | 8,7 | 14,1 | 16,9 |     |     |
|                      | AlHFs-1Cu2.3Zn-1.5 | 0,0                 | 0,0 | 0,6  | 2,0  | 0,0 | 0,2 | 1,6  | 3,8  | 0,0 | 0,8 | 2,2  | 5,3  |     |     |
| AlHFs-CuZn catalysts | AlHFs-1Cu2.3Zn-3   | 0,3                 | 2,4 | 4,1  | 7,1  | 0,3 | 2,4 | 5,0  | 8,8  | 1,0 | 2,1 | 4,6  | 8,2  |     |     |
|                      | AlHFs-1Cu2.3Zn-7   | 1,0                 | 3,2 | 7,2  | 12,0 | 1,4 | 4,1 | 8,6  | 15,0 | 1,6 | 3,6 | 8,1  | 12,7 |     |     |
|                      | AlHFs-1Cu2.3Zn-10  | 1,1                 | 3,5 | 7,3  | 12,9 | 1,3 | 3,4 | 8,1  | 15,8 | 1,2 | 3,6 | 8,5  | 14,2 |     |     |
|                      |                    |                     |     |      |      |     |     |      |      |     |     |      |      |     |     |

**Table S8** CO yield for all catalysts at pressures of 10, 30, 50 bar and temperatures of 225, 250, 275, 300 °C.

|                      |                    | CH4 Yield [%]       |     |     |     |     |     |     |     |     |     |     |     |  |  |
|----------------------|--------------------|---------------------|-----|-----|-----|-----|-----|-----|-----|-----|-----|-----|-----|--|--|
|                      |                    | Pressure [bar] =>   |     | 10  |     |     |     | 30  |     |     |     | 50  |     |  |  |
|                      |                    | Temperature [°C] => |     |     |     |     |     |     |     |     |     |     |     |  |  |
| AlHFs-Zn catalysts   | AlHFs-Zn-1.5       | 0,0                 | 0,0 | 0,0 | 0,0 | 0,0 | 0,0 | 0,0 | 0,0 | 0,0 | 0,0 | 0,0 | 0,0 |  |  |
|                      | AlHFs-Zn-3         | 0,0                 |     | 0,0 | 0,0 | 0,0 | 0,0 | 0,0 | 0,0 | 0,0 | 0,0 | 0,0 | 0,0 |  |  |
|                      | AlHFs-Zn-7         | 0,0                 | 0,0 | 0,0 | 0,0 | 0,0 | 0,0 | 0,0 | 0,0 | 0,0 | 0,0 | 0,0 | 0,0 |  |  |
|                      | AlHFs-Zn-10        | 0,0                 | 0,0 | 0,0 | 0,0 | 0,0 | 0,0 | 0,0 | 0,0 | 0,0 | 0,0 | 0,0 | 0,0 |  |  |
|                      | AlHFs-Cu-1.5       | 0,0                 | 0,1 | 0,1 | 0,2 | 0,0 | 0,1 | 0,2 | 0,3 | 0,0 | 0,1 | 0,2 | 0,3 |  |  |
| AlHFs-Cu catalysts   | AlHFs-Cu-3         | 0,0                 | 0,1 | 0,1 | 0,3 | 0,0 | 0,1 | 0,2 | 0,4 | 0,0 | 0,1 | 0,2 | 1,5 |  |  |
|                      | AlHFs-Cu-7         | 0,0                 | 0,0 | 0,1 | 0,2 | 0,0 | 0,1 | 0,3 | 0,7 | 0,1 | 0,2 | 0,4 | 0,9 |  |  |
|                      | AlHFs-Cu-10        | 0,0                 | 0,1 | 0,2 | 0,3 | 0,1 | 0,1 | 0,3 | 0,7 | 0,1 | 0,2 | 0,4 | 1,0 |  |  |
|                      | AlHFs-1Cu2.3Zn-1.5 | 0,0                 | 0,0 | 0,0 | 0,0 | 0,0 | 0,0 | 0,0 | 0,0 | 0,0 | 0,0 | 0,0 | 0,0 |  |  |
| AlHFs-CuZn catalysts | AlHFs-1Cu2.3Zn-3   | 0,0                 | 0,1 | 0,1 | 0,2 | 0,0 | 0,1 | 0,2 | 0,4 | 0,0 | 0,1 | 0,2 | 0,3 |  |  |
|                      | AlHFs-1Cu2.3Zn-7   | 0,0                 | 0,0 | 0,1 | 0,1 | 0,0 | 0,0 | 0,1 | 0,3 | 0,0 | 0,1 | 0,2 | 0,4 |  |  |
|                      | AlHFs-1Cu2.3Zn-10  | 0,0                 | 0,0 | 0,1 | 0,1 | 0,0 | 0,0 | 0,1 | 0,3 | 0,0 | 0,1 | 0,2 | 0,5 |  |  |
|                      |                    |                     |     |     |     |     |     |     |     |     |     |     |     |  |  |

**Table S9** CH<sub>4</sub> yield for all catalysts at pressures of 10, 30, 50 bar and temperatures of 225, 250, 275, 300 °C.



| MeOH Production [g <sub>MeOH</sub> /h/kg <sub>Cu</sub> ] |                    |      |      |       |       |       |       |       |       |       |       |       |        |
|----------------------------------------------------------|--------------------|------|------|-------|-------|-------|-------|-------|-------|-------|-------|-------|--------|
| Pressure [bar] =>                                        |                    | 10   |      |       |       | 30    |       |       |       | 50    |       |       |        |
| Temperature [°C] =>                                      |                    | 225  | 250  | 275   | 300   | 225   | 250   | 275   | 300   | 225   | 250   | 275   | 300    |
| AlHFs-Cu catalysts                                       | AlHFs-Cu-1.5       | 11.6 | 0.0  | 119.0 | 102.5 | 57.1  | 107.9 | 308.7 | 272.4 | 75.6  | 69.8  | 171.1 | 18.3   |
|                                                          | AlHFs-Cu-3         | 5.9  | 21.3 | 88.1  | 95.1  | 67.1  | 107.4 | 244.1 | 262.5 | 71.1  | 172.5 | 261.3 | 462.0  |
|                                                          | AlHFs-Cu-7         | 0.0  | 60.0 | 113.6 | 80.1  | 130.1 | 230.1 | 385.3 | 352.3 | 220.5 | 336.8 | 513.3 | 686.1  |
|                                                          | AlHFs-Cu-10        | 54.1 | 92.0 | 113.4 | 53.1  | 146.8 | 235.3 | 316.7 | 311.6 | 239.1 | 356.2 | 485.6 | 553.3  |
| AlHFs-CuZn                                               | AlHFs-1Cu2.3Zn-1.5 | 0.0  | 0.0  | 0.0   | 0.0   | 167.5 | 32.0  | 0.0   | 0.0   | 35.0  | 54.5  | 0.0   | 99.8   |
|                                                          | AlHFs-1Cu2.3Zn-3   | 22.0 | 0.0  | 201.5 | 254.5 | 105.0 | 211.0 | 559.1 | 558.7 | 175.3 | 239.6 | 397.5 | 286.5  |
|                                                          | AlHFs-1Cu2.3Zn-7   | 21.5 | 87.8 | 239.3 | 271.6 | 213.0 | 351.0 | 706.6 | 775.7 | 296.5 | 484.0 | 799.7 | 1106.3 |
|                                                          | AlHFs-1Cu2.3Zn-10  | 0.0  | 35.2 | 168.2 | 198.4 | 169.3 | 254.7 | 502.4 | 590.7 | 241.6 | 384.0 | 657.5 | 894.3  |

**Table S10** Space time yield of methanol per gram of Cu for AlNFs-Cu and AlNFs-1Cu2.3Zn catalysts at pressures of 10, 30, 50 bar and temperatures of 225, 250, 275, 300 °C.

| DME Production [g <sub>DME</sub> /h/kg <sub>Cu</sub> ] |                    |       |       |       |       |       |       |       |       |       |       |       |       |
|--------------------------------------------------------|--------------------|-------|-------|-------|-------|-------|-------|-------|-------|-------|-------|-------|-------|
| Pressure [bar] =>                                      |                    | 10    |       |       |       | 30    |       |       |       | 50    |       |       |       |
| Temperature [°C] =>                                    |                    | 225   | 250   | 275   | 300   | 225   | 250   | 275   | 300   | 225   | 250   | 275   | 300   |
| AlHFs-Cu catalysts                                     | AlHFs-Cu-1.5       | 63.4  | 103.2 | 75.6  | 44.0  | 174.5 | 173.7 | 225.7 | 140.8 | 105.7 | 178.3 | 104.9 | 26.2  |
|                                                        | AlHFs-Cu-3         | 45.7  | 96.0  | 88.6  | 44.9  | 152.8 | 204.1 | 216.4 | 132.2 | 107.4 | 241.4 | 288.8 | 217.0 |
|                                                        | AlHFs-Cu-7         | 71.4  | 88.5  | 75.2  | 19.6  | 153.6 | 213.6 | 245.9 | 219.2 | 150.3 | 234.7 | 322.1 | 469.2 |
|                                                        | AlHFs-Cu-10        | 71.3  | 81.8  | 61.6  | 13.0  | 128.9 | 170.6 | 211.3 | 195.4 | 122.7 | 184.3 | 278.0 | 397.1 |
| AlHFs-CuZn                                             | AlHFs-1Cu2.3Zn-1.5 | 0.0   | 0.0   | 0.0   | 19.9  | 0.0   | 0.0   | 25.9  | 88.9  | 0.0   | 21.0  | 35.9  | 0.0   |
|                                                        | AlHFs-1Cu2.3Zn-3   | 117.7 | 174.6 | 172.2 | 108.8 | 251.4 | 381.9 | 412.0 | 272.0 | 207.0 | 320.1 | 370.7 | 81.0  |
|                                                        | AlHFs-1Cu2.3Zn-7   | 49.0  | 188.4 | 209.6 | 135.6 | 251.9 | 441.8 | 557.0 | 532.7 | 222.0 | 530.9 | 757.2 | 760.4 |
|                                                        | AlHFs-1Cu2.3Zn-10  | 26.9  | 48.7  | 145.2 | 88.4  | 117.6 | 245.5 | 388.7 | 379.0 | 117.6 | 378.0 | 546.4 | 605.6 |

**Table S11** Space time yield to DME per gram of Cu for AlNFs-Cu and AlNFs-1Cu2.3Zn catalysts at pressures of 10, 30, 50 bar and temperatures of 225, 250, 275, 300 °C.

| Production of the Oxygenated products - MeOH and DME [g <sub>MeOH+DME</sub> /h/kg <sub>Cu</sub> ] |                    |       |       |       |       |       |       |        |        |       |        |        |        |
|---------------------------------------------------------------------------------------------------|--------------------|-------|-------|-------|-------|-------|-------|--------|--------|-------|--------|--------|--------|
| Pressure [bar] =>                                                                                 |                    | 10    |       |       |       | 30    |       |        |        | 50    |        |        |        |
| Temperature [°C] =>                                                                               |                    | 225   | 250   | 275   | 300   | 225   | 250   | 275    | 300    | 225   | 250    | 275    | 300    |
| AlHFs-Cu catalysts                                                                                | AlHFs-Cu-1.5       | 75.1  | 103.2 | 194.6 | 146.6 | 231.7 | 281.6 | 534.4  | 413.1  | 181.3 | 248.1  | 276.1  | 44.5   |
|                                                                                                   | AlHFs-Cu-3         | 51.6  | 117.3 | 176.7 | 140.0 | 219.9 | 311.5 | 460.5  | 394.7  | 178.5 | 413.9  | 550.1  | 679.0  |
|                                                                                                   | AlHFs-Cu-7         | 71.4  | 148.5 | 188.8 | 99.8  | 283.7 | 443.6 | 631.2  | 571.5  | 370.8 | 571.5  | 835.4  | 1155.3 |
|                                                                                                   | AlHFs-Cu-10        | 125.4 | 173.8 | 175.0 | 66.1  | 275.7 | 406.0 | 528.0  | 507.0  | 361.8 | 540.4  | 763.6  | 950.4  |
| AlHFs-CuZn                                                                                        | AlHFs-1Cu2.3Zn-1.5 | 0.0   | 0.0   | 0.0   | 19.9  | 167.5 | 32.0  | 25.9   | 88.9   | 35.0  | 75.5   | 35.9   | 99.8   |
|                                                                                                   | AlHFs-1Cu2.3Zn-3   | 139.7 | 174.6 | 373.8 | 363.3 | 356.4 | 592.9 | 971.1  | 830.7  | 382.3 | 559.8  | 768.2  | 367.5  |
|                                                                                                   | AlHFs-1Cu2.3Zn-7   | 70.5  | 276.2 | 448.9 | 407.2 | 464.9 | 792.7 | 1263.6 | 1308.3 | 518.5 | 1014.9 | 1556.9 | 1866.7 |
|                                                                                                   | AlHFs-1Cu2.3Zn-10  | 26.9  | 83.9  | 313.4 | 286.8 | 286.9 | 500.2 | 891.1  | 969.6  | 359.1 | 762.1  | 1203.8 | 1499.9 |

**Table S12** Space time yield to Methanol and DME per gram of Cu for AlNFs-Cu and AlNFs-1Cu2.3Zn catalysts at pressures of 10,30,50 bar and temperatures of 225, 250, 275, 300 °C.

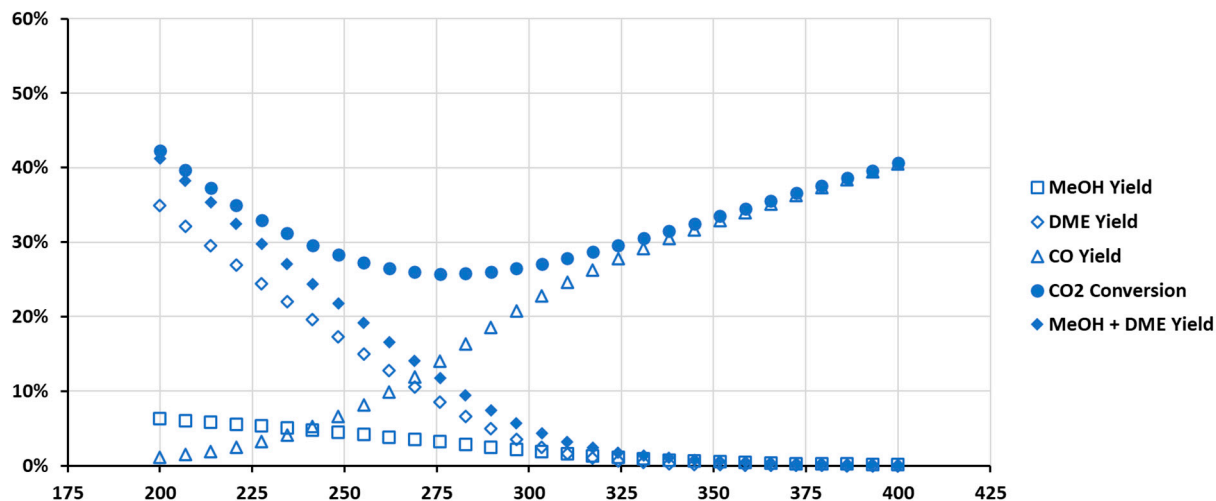

**Figure S9:** Effect of temperature on CO<sub>2</sub> conversion and yields to Methanol, Dimethyl ether and CO at equilibrium at 30 bar pressure and H<sub>2</sub>/CO<sub>2</sub>=4 ratio.

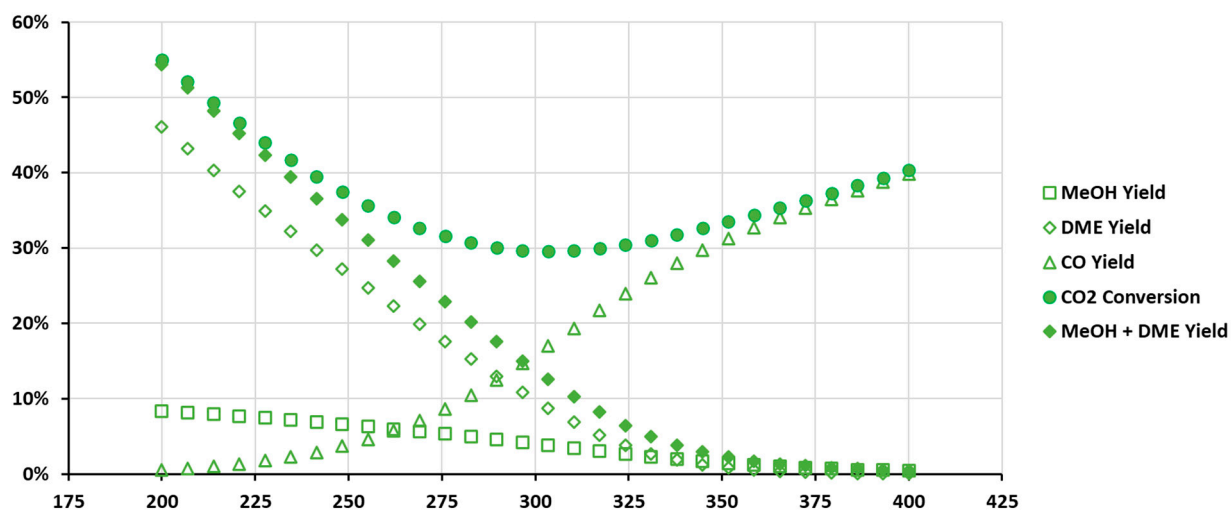

**Figure S10:** Effect of temperature on CO<sub>2</sub> conversion and yields to Methanol, Dimethyl ether and CO at equilibrium at 50 bar pressure and H<sub>2</sub>/CO<sub>2</sub>=4 ratio.

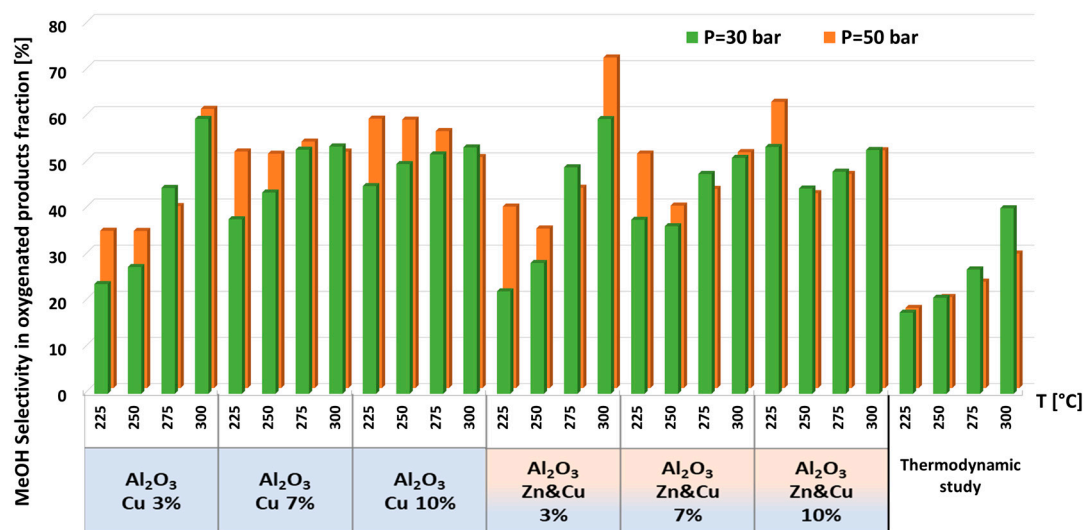

**Figure S11.** Selectivity to methanol in oxygenated products (MeOH and DME) fraction for some AlNFs-Cu and AlNFs-1Cu2.3Zn catalysts at pressures of 30 and 50 bar and temperatures of 225, 250, 275, 300 °C.

## References:

1. Wang, L.; Etim, U.J.; Zhang, C.; Amirav, L.; Zhong, Z. CO<sub>2</sub> Activation and Hydrogenation on Cu-ZnO/Al<sub>2</sub>O<sub>3</sub> Nanorod Catalysts: An In Situ FTIR Study. *Nanomaterials* **2022**, *12*, 1–15, doi:10.3390/nano12152527.
2. Navarro-Jaén, S.; Virginie, M.; Thuriot-Roukos, J.; Wojcieszak, R.; Khodakov, A.Y. Structure–Performance Correlations in the Hybrid Oxide-Supported Copper–Zinc SAPO-34 Catalysts for Direct Synthesis of Dimethyl Ether from CO<sub>2</sub>. *J. Mater. Sci.* **2022**, *57*, 3268–3279, doi:10.1007/s10853-022-06890-w.
3. Lam, E.; Corral-Pérez, J.J.; Larmier, K.; Noh, G.; Wolf, P.; Comas-Vives, A.; Urakawa, A.; Copéret, C. CO<sub>2</sub> Hydrogenation on Cu/Al<sub>2</sub>O<sub>3</sub>: Role of the Metal/Support Interface in Driving Activity and Selectivity of a Bifunctional Catalyst. *Angew. Chemie - Int. Ed.* **2019**, *58*, 13989–13996, doi:10.1002/anie.201908060.
4. Navarro-Jaén, S.; Virginie, M.; Morin, J.C.; Thuriot-Roukos, J.; Wojcieszak, R.; Khodakov, A.Y. Hybrid Monometallic and Bimetallic Copper-Palladium Zeolite Catalysts for Direct Synthesis of Dimethyl Ether from CO<sub>2</sub>. *New J. Chem.* **2022**, *46*, 3889–3900, doi:10.1039/d1nj05734k.
5. Carvalho, D.F.; Almeida, G.C.; Monteiro, R.S.; Mota, C.J.A. Hydrogenation of CO<sub>2</sub> to Methanol and Dimethyl Ether over a Bifunctional Cu-ZnO Catalyst Impregnated on Modified  $\gamma$ -Alumina. *Energy and Fuels* **2020**, *34*, 7269–7274, doi:10.1021/acs.energyfuels.0c00680.
